# Supplementary material for: Conjunctive spatial and self-motion codes are topographically organized in the GABAergic cells of the lateral septum
Source: PubMed Central journal article supplement (PMC8432898; doi:10.1371/journal.pbio.3001383), 2021-08-30

# S1 Fig

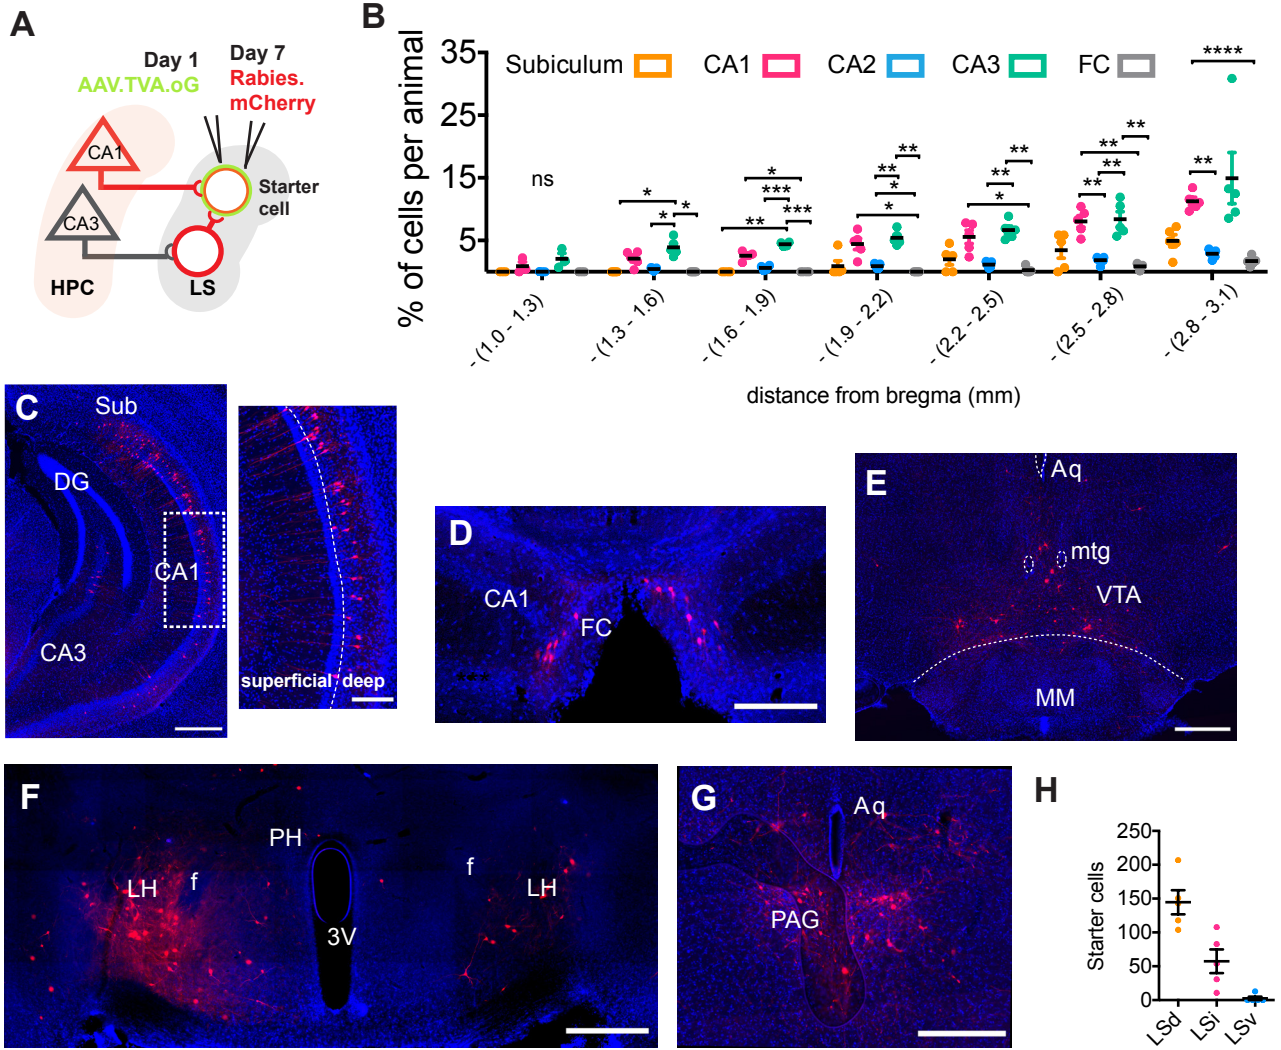

Supplement: pbio.3001383.s003.pdf [file pbio.3001383.s003.pdf]
