# Supplementary material for: Conjunctive spatial and self-motion codes are topographically organized in the GABAergic cells of the lateral septum
Source: PubMed Central journal article supplement (PMC8432898; doi:10.1371/journal.pbio.3001383), 2021-08-30

# S3 Fig

**A**

trans-hippocampal implant

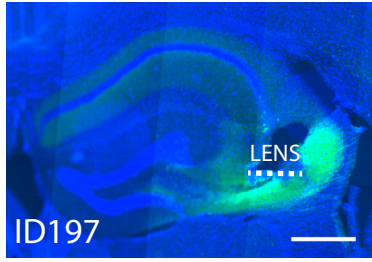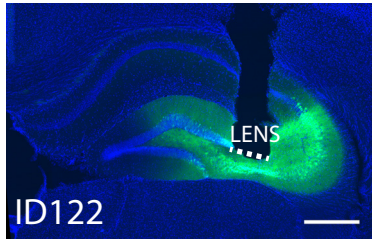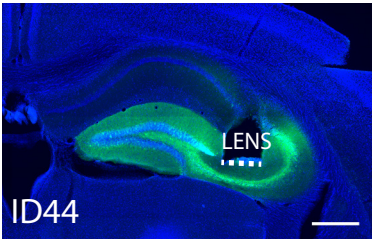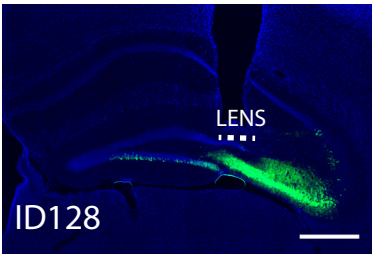

extra-hippocampal implant

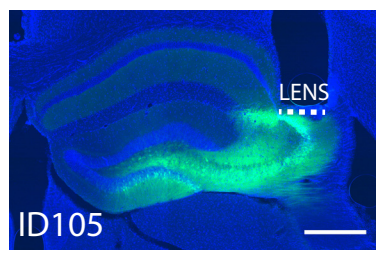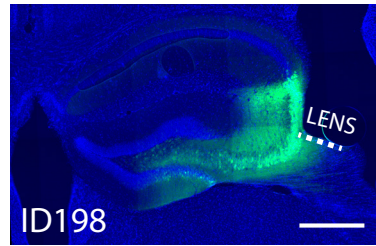

**B**

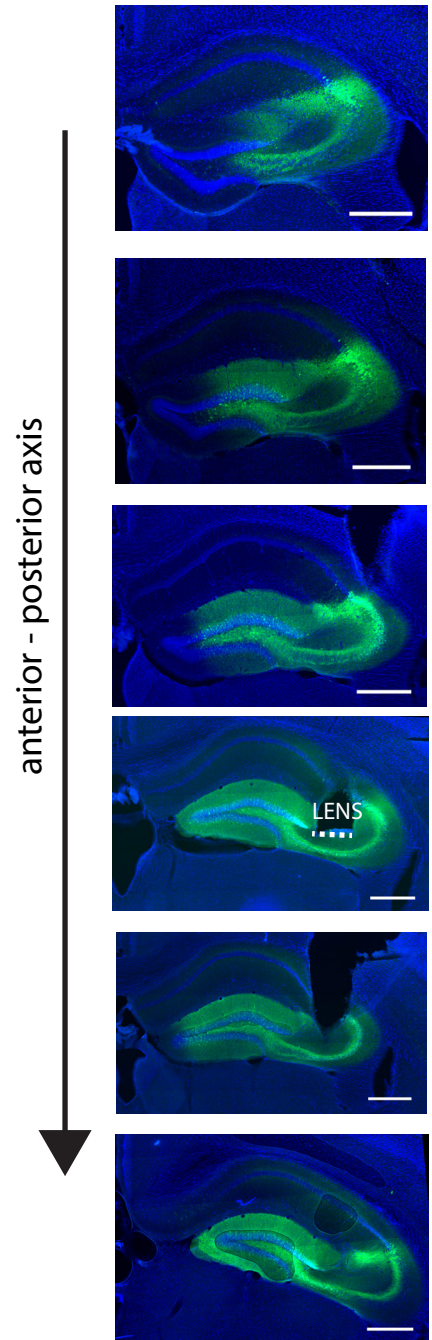

**C**

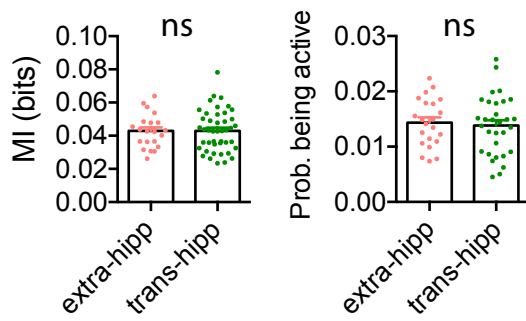

Supplement: pbio.3001383.s005.pdf [file pbio.3001383.s005.pdf]
